# Supplementary material for: Some in situ reflectance Fourier transform infrared studies of electrochemically prepared polybenzo[c]thiophene and poly-5-fluorobenzo[c]thiophene filmsElectronic supplementary information (ESI) available: schematic representation of the energy levels of polybenzothiophenes, CVs and FTIR spectra. See http://www.rsc.org/suppdata/jm/b1/b108054g/
Source: Royal Society of Chemistry journal article supplement (doi:10.1039/b108054g), 2001-12-03
Supplement: b108054g.doc [file b108054g.doc]

#
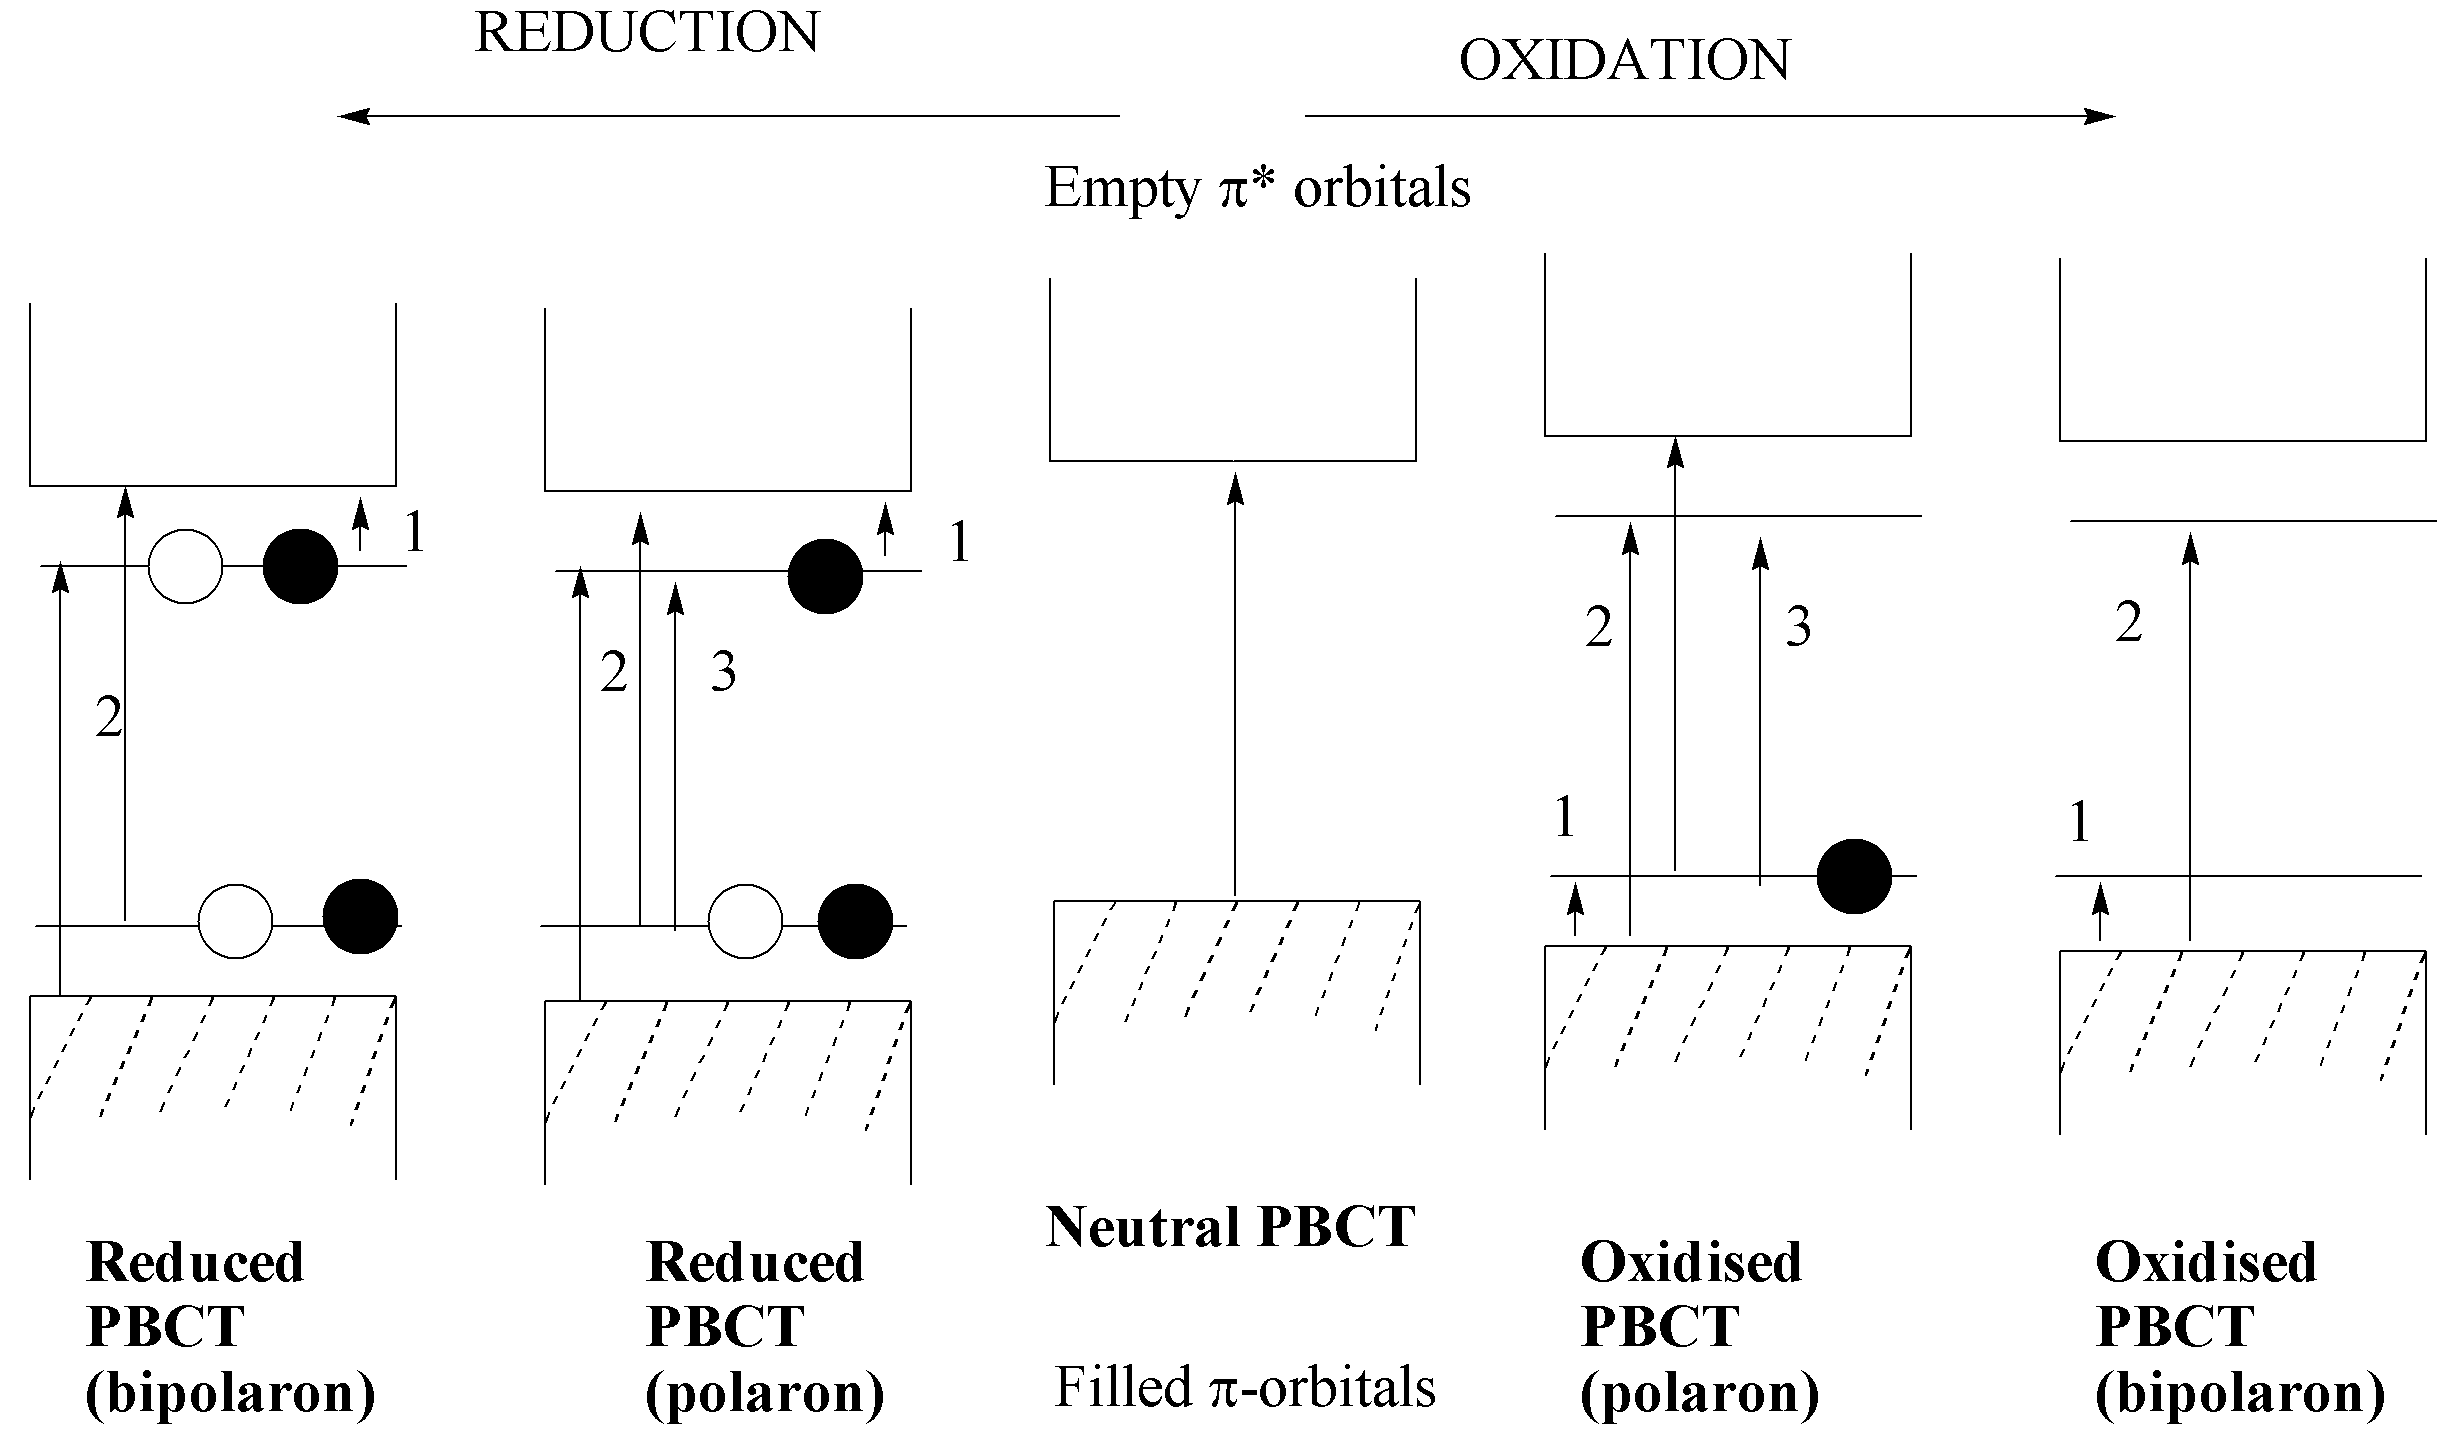


Figure S1. Schematic representation of the energy levels and possible electronic transitions in undoped (centre), p–doped (polaron carrier, right; bipolaron carrier, far right) and n–doped (polaron carrier, left; bipolaron carrier, far left) polybenzo[c]thiophenes.


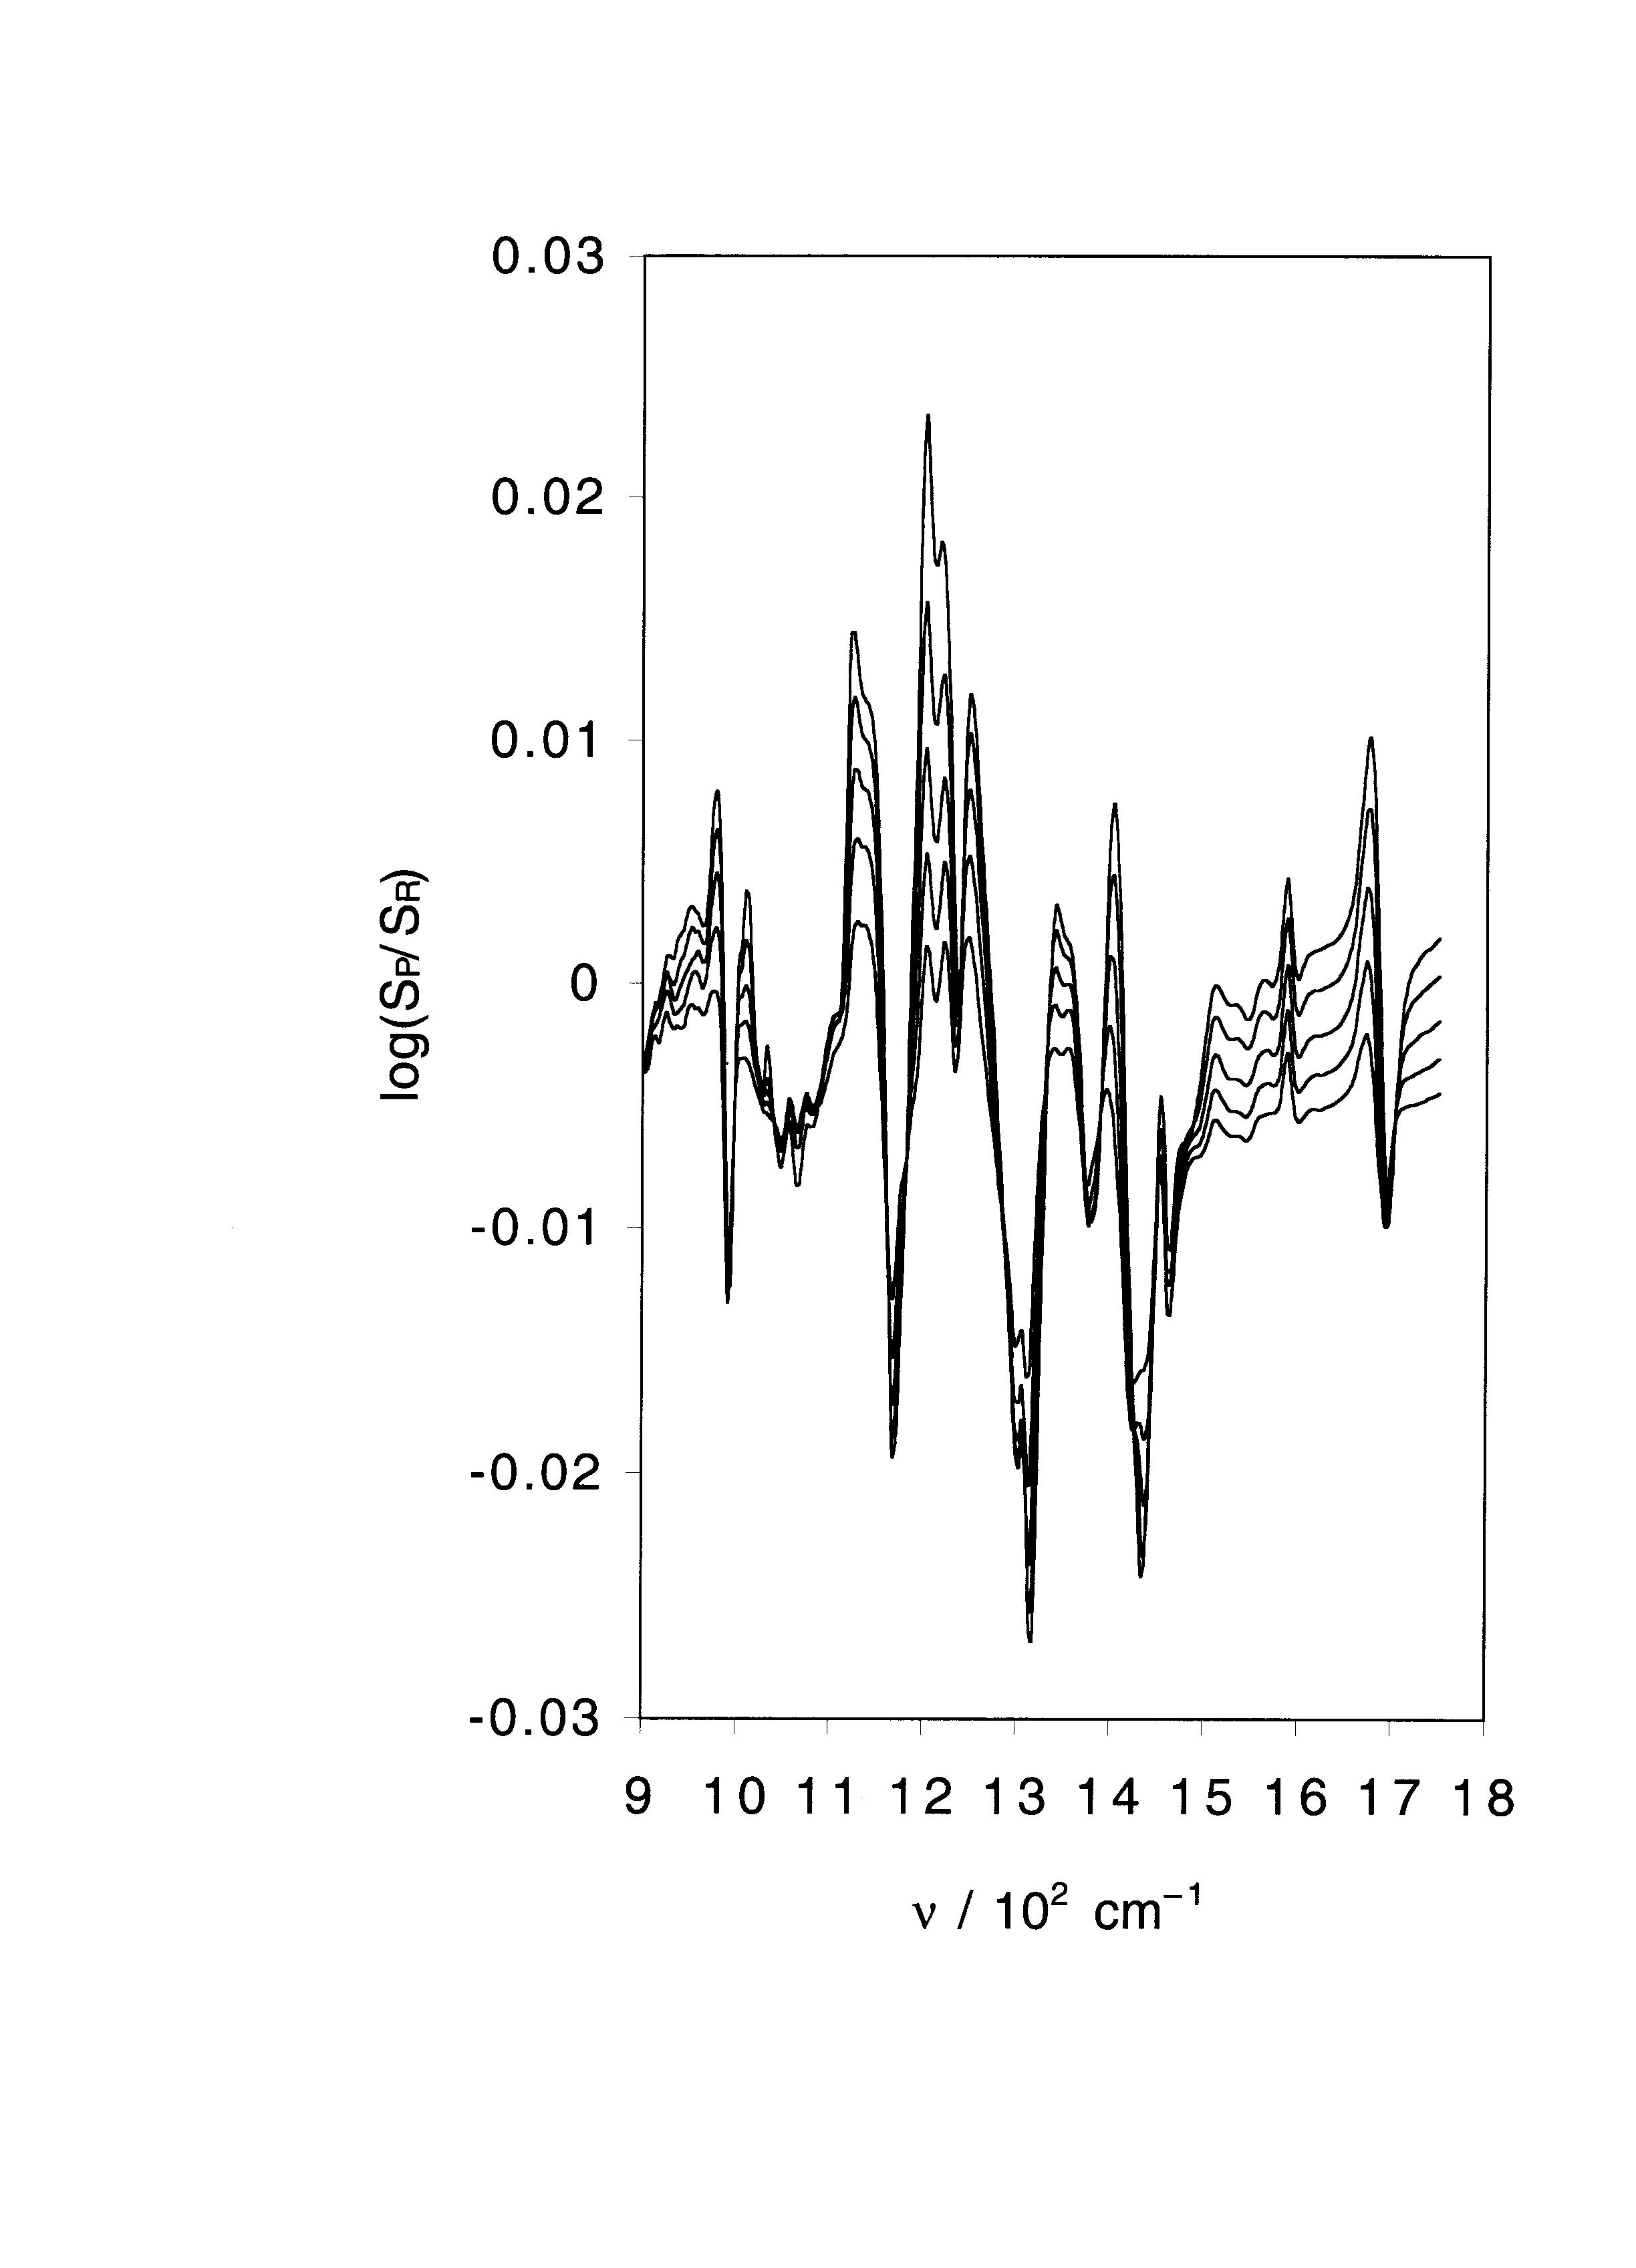


Figure S2. FTIR spectra of a PBCT film, collected at 0.1 V intervals from +0.6 V to +1.0 V, normalised to a reference spectrum taken at +0.5 V, in the region from 900 – 1800 cm–1.


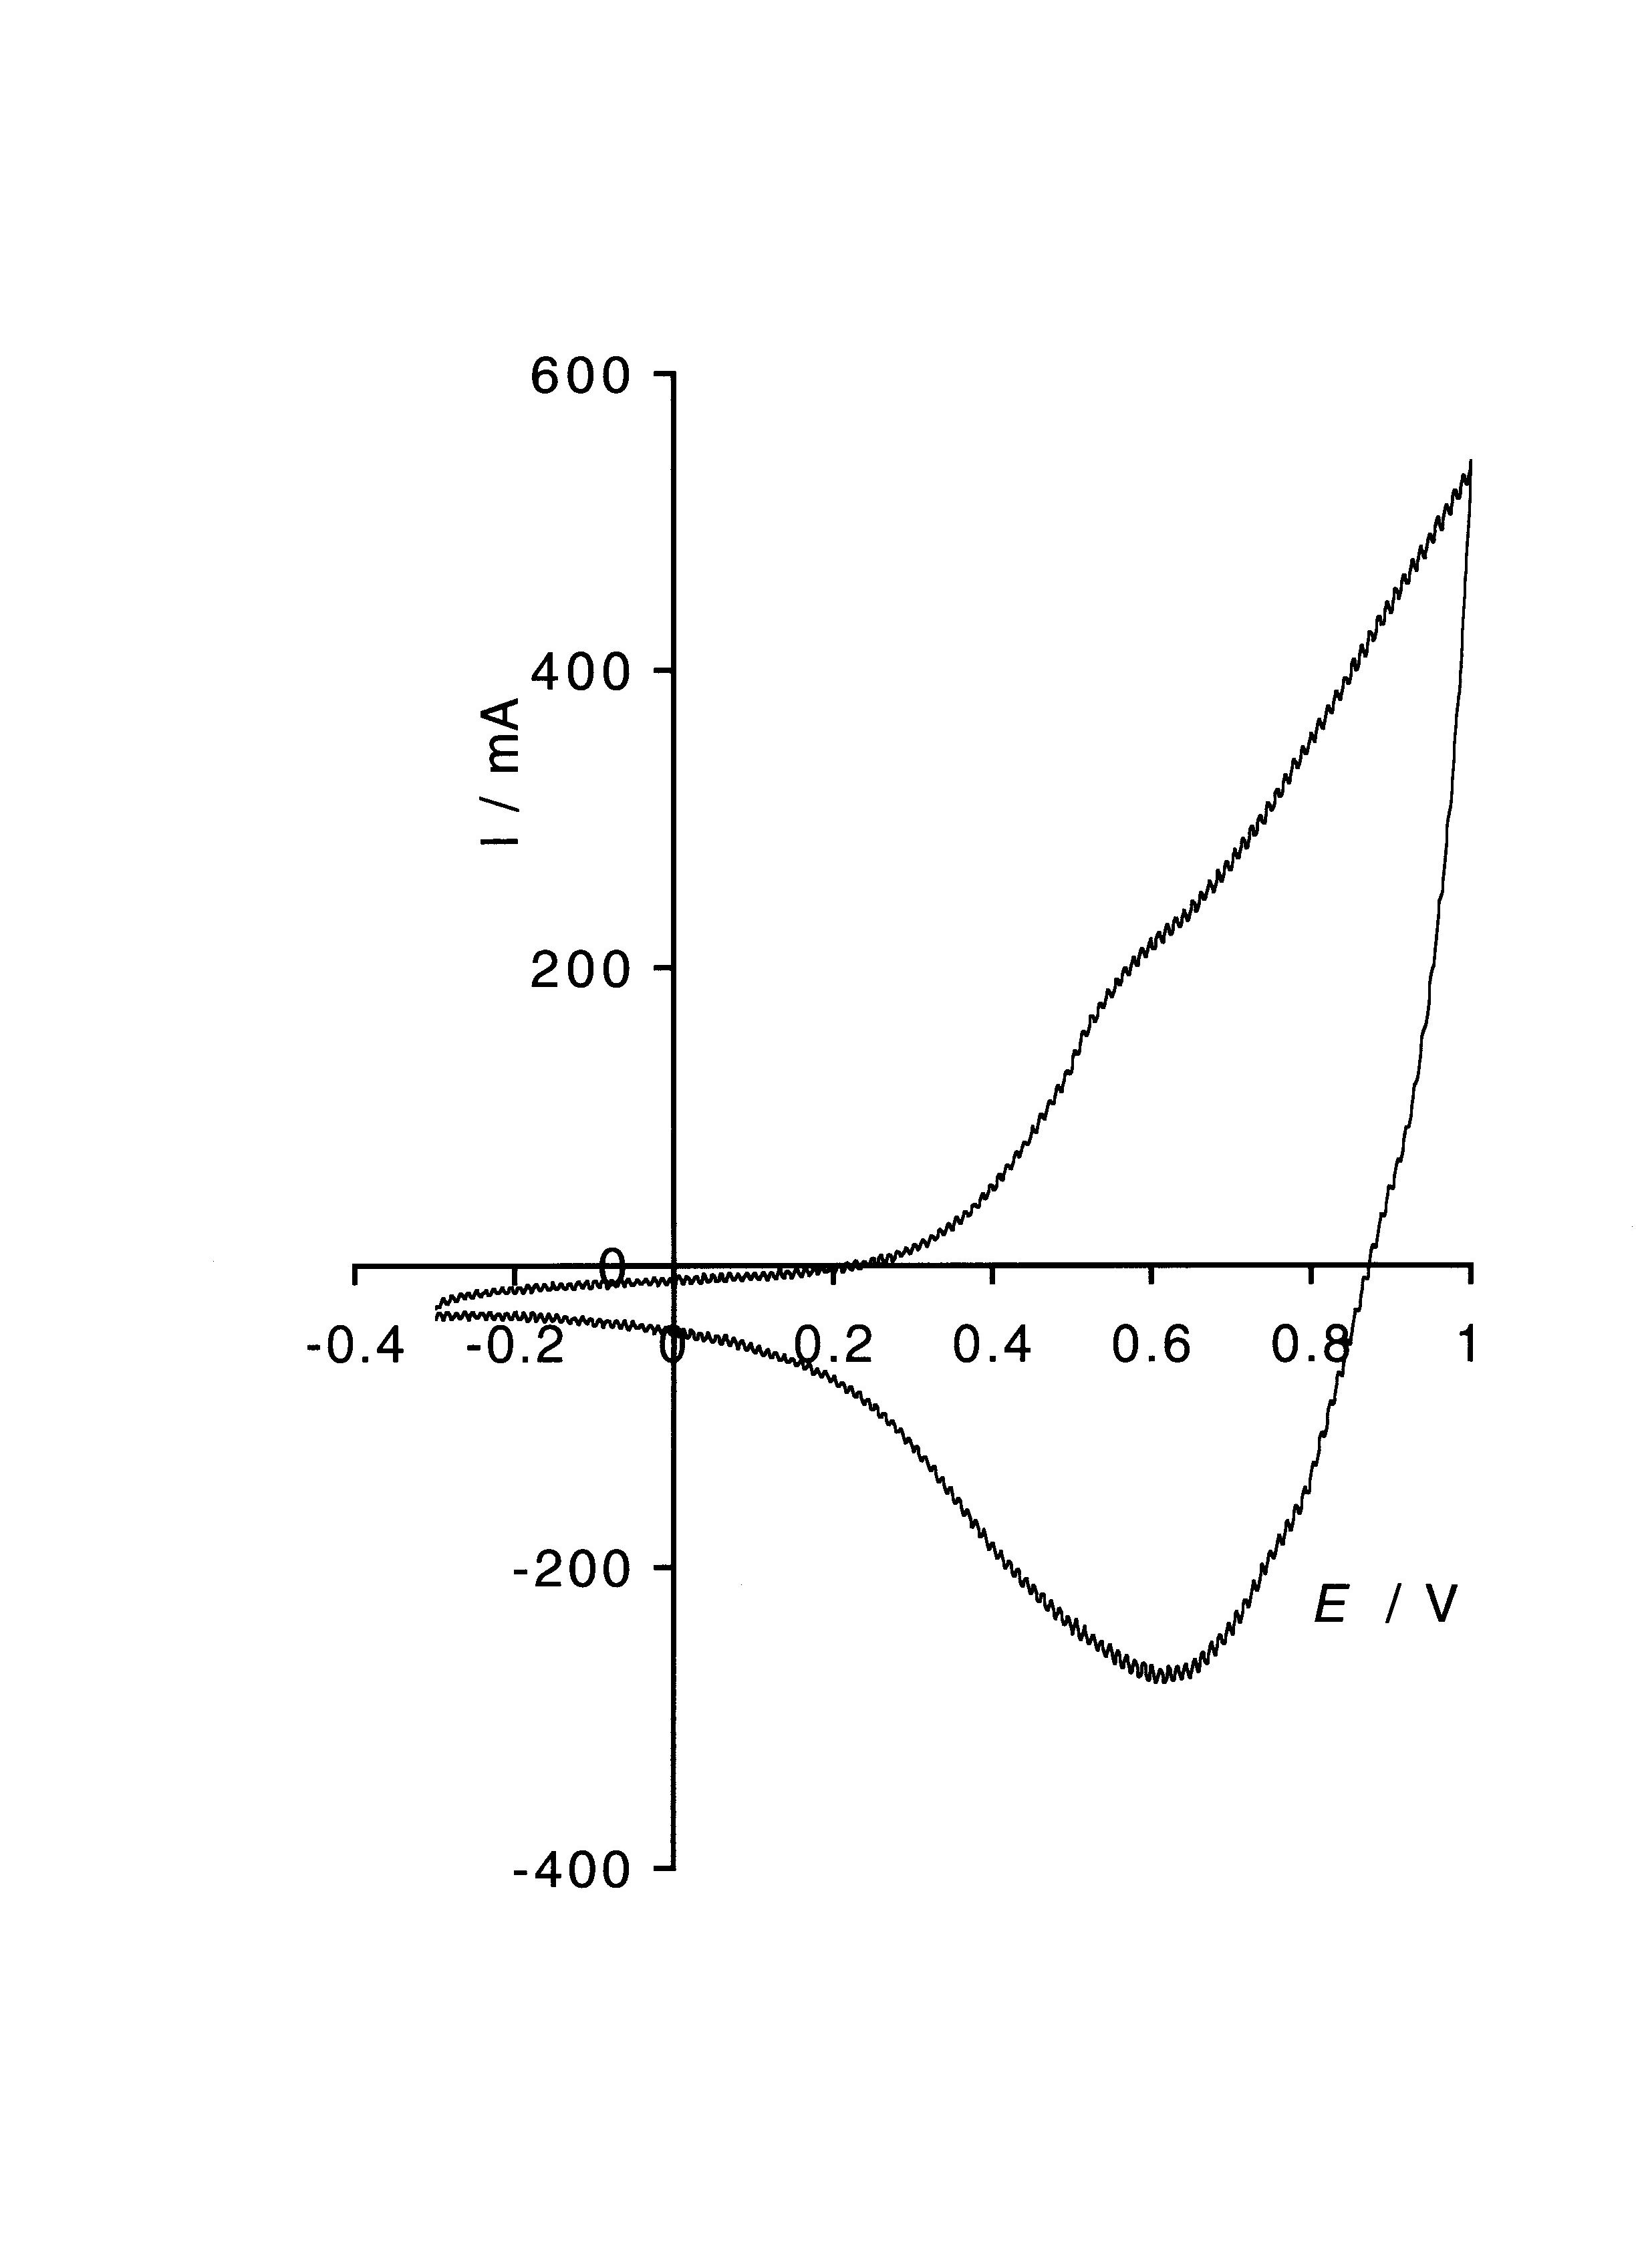


Figure S3. Cyclic voltammogram (p–doping potential region) of PFBCT film grown in the *in situ* FTIR cell, immediately prior to the film being pushed against the cell window for the p–doping experiment depicted in Figures 3 and S4, S5. Scan rate 98 mV s–1.


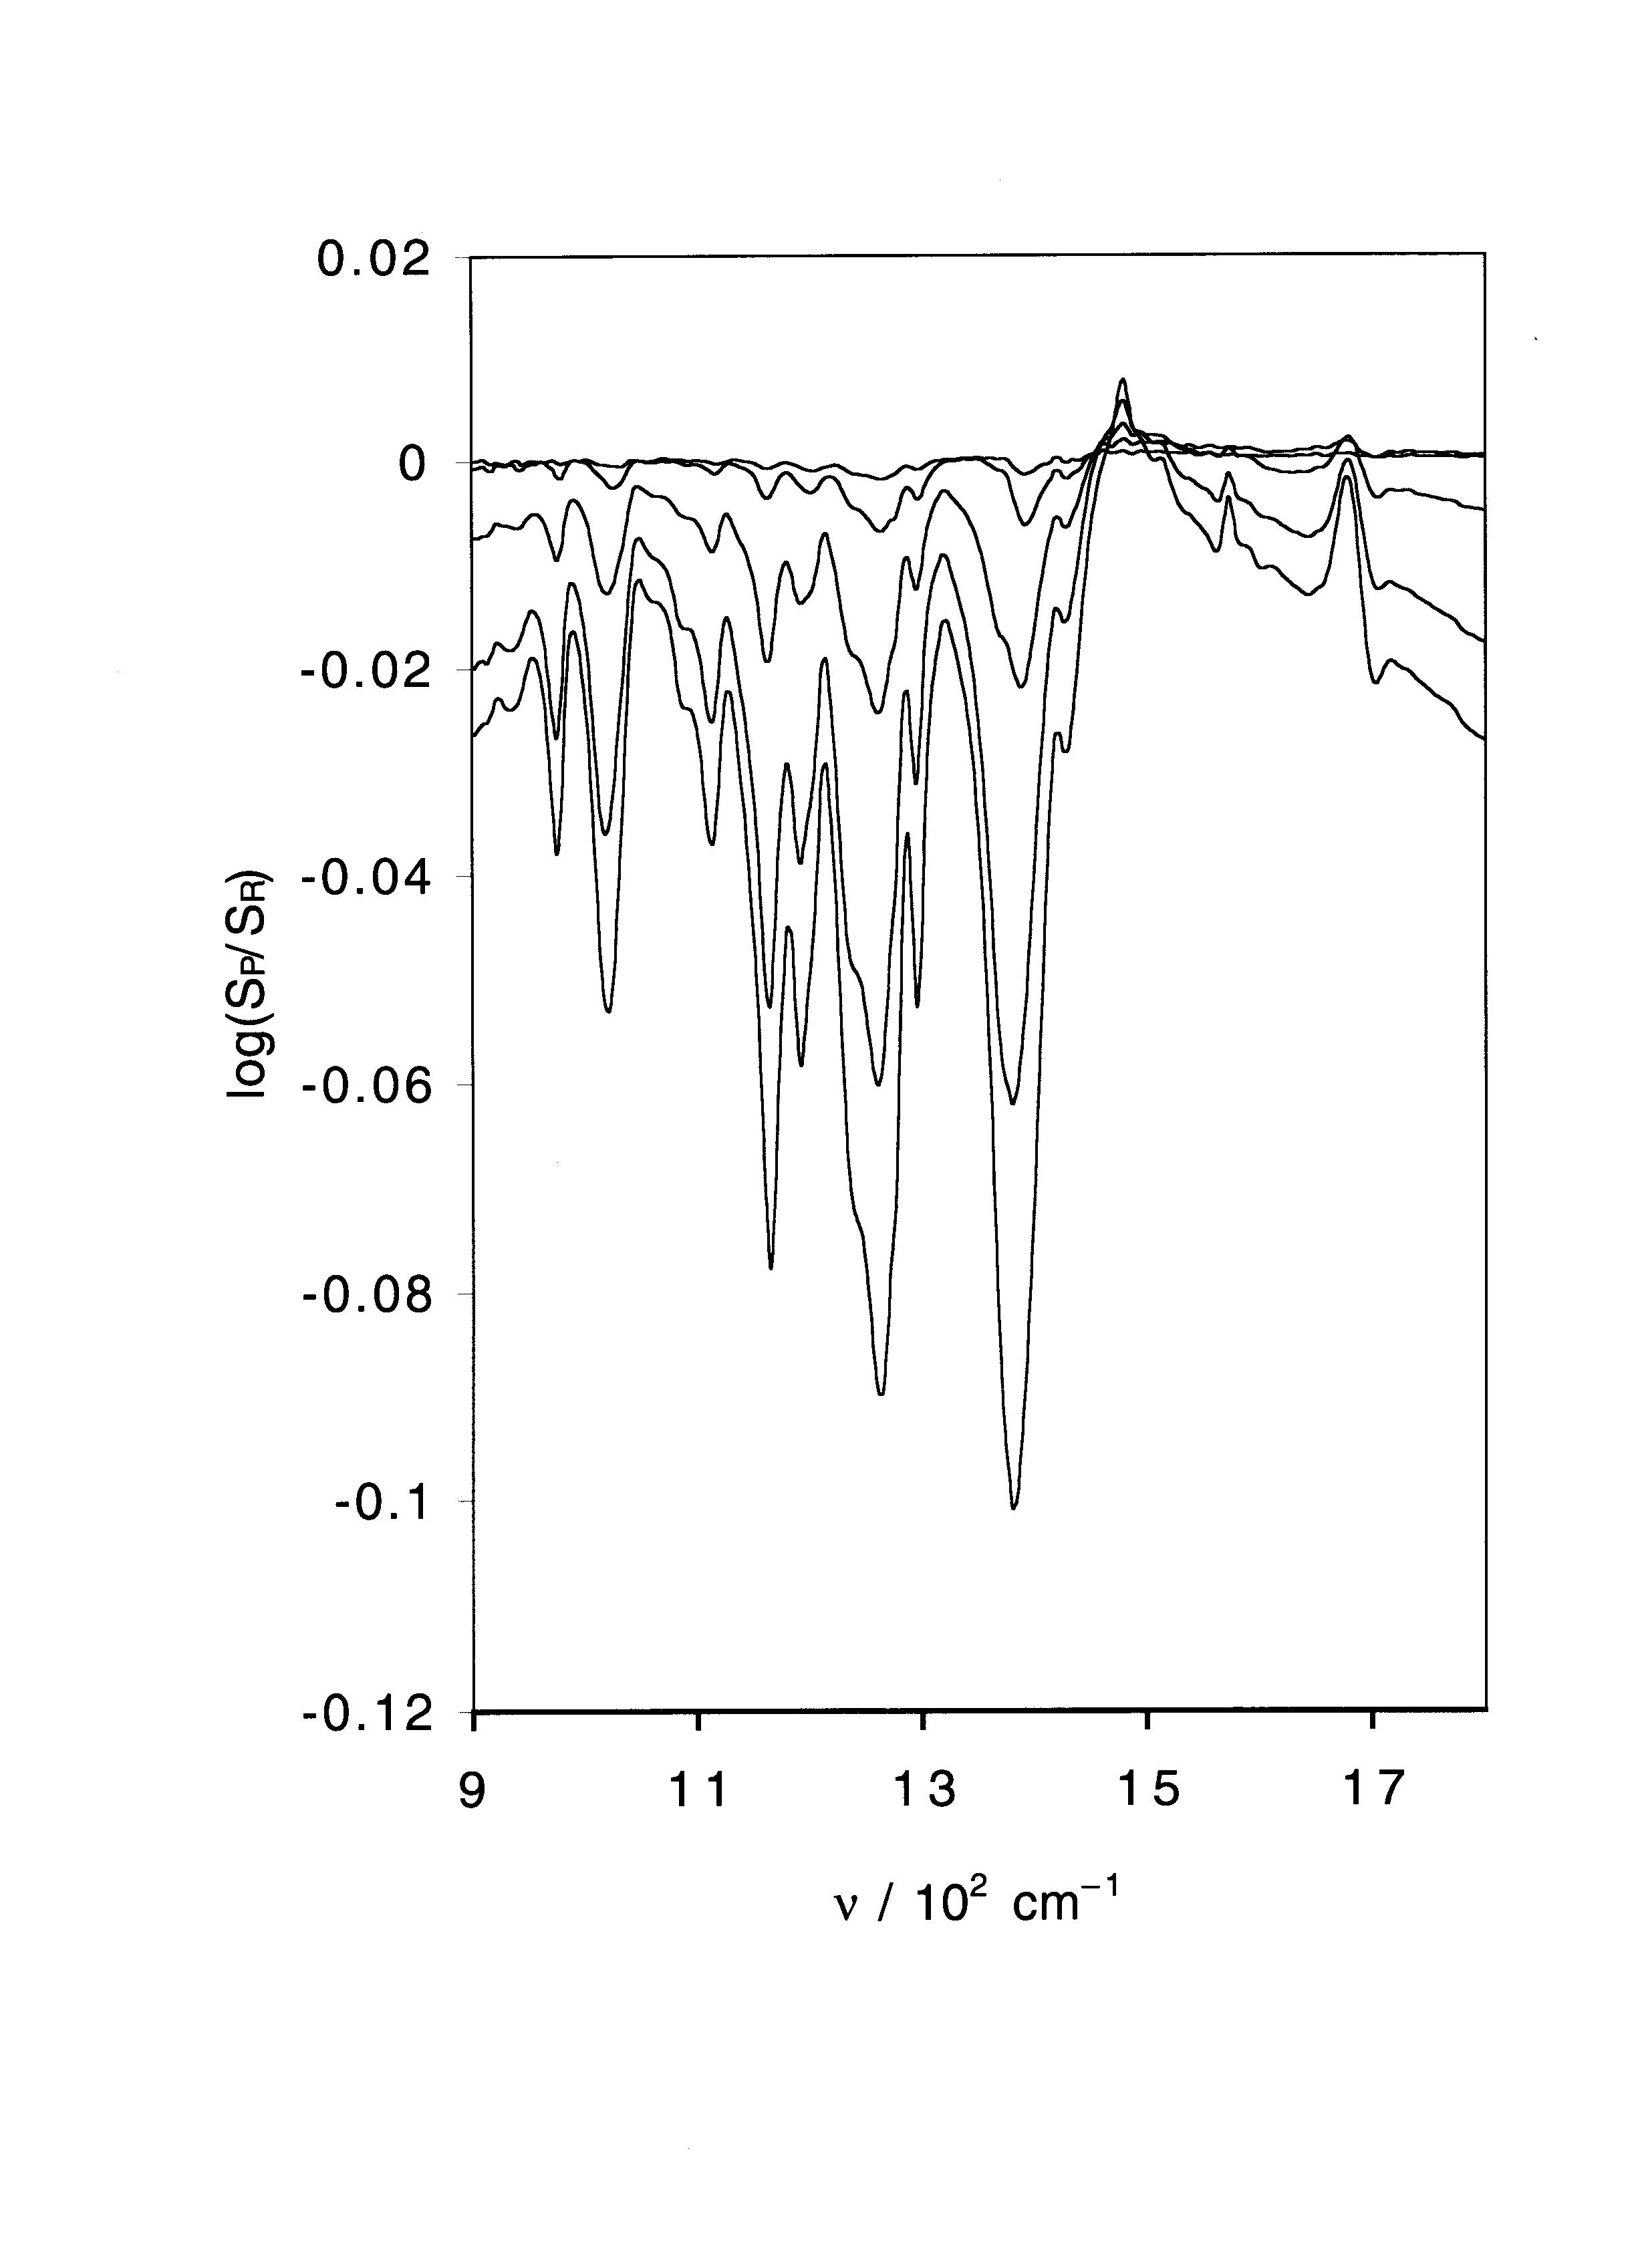


Figure S4 FTIR spectra of a PFBCT film, collected at 0.1 V intervals from 0 V to +0.5 V (in order of increasing band intensity at 6000 cm–1), normalised to a reference spectrum taken at –0.2 V, in the region from 900 – 1800 cm–1.


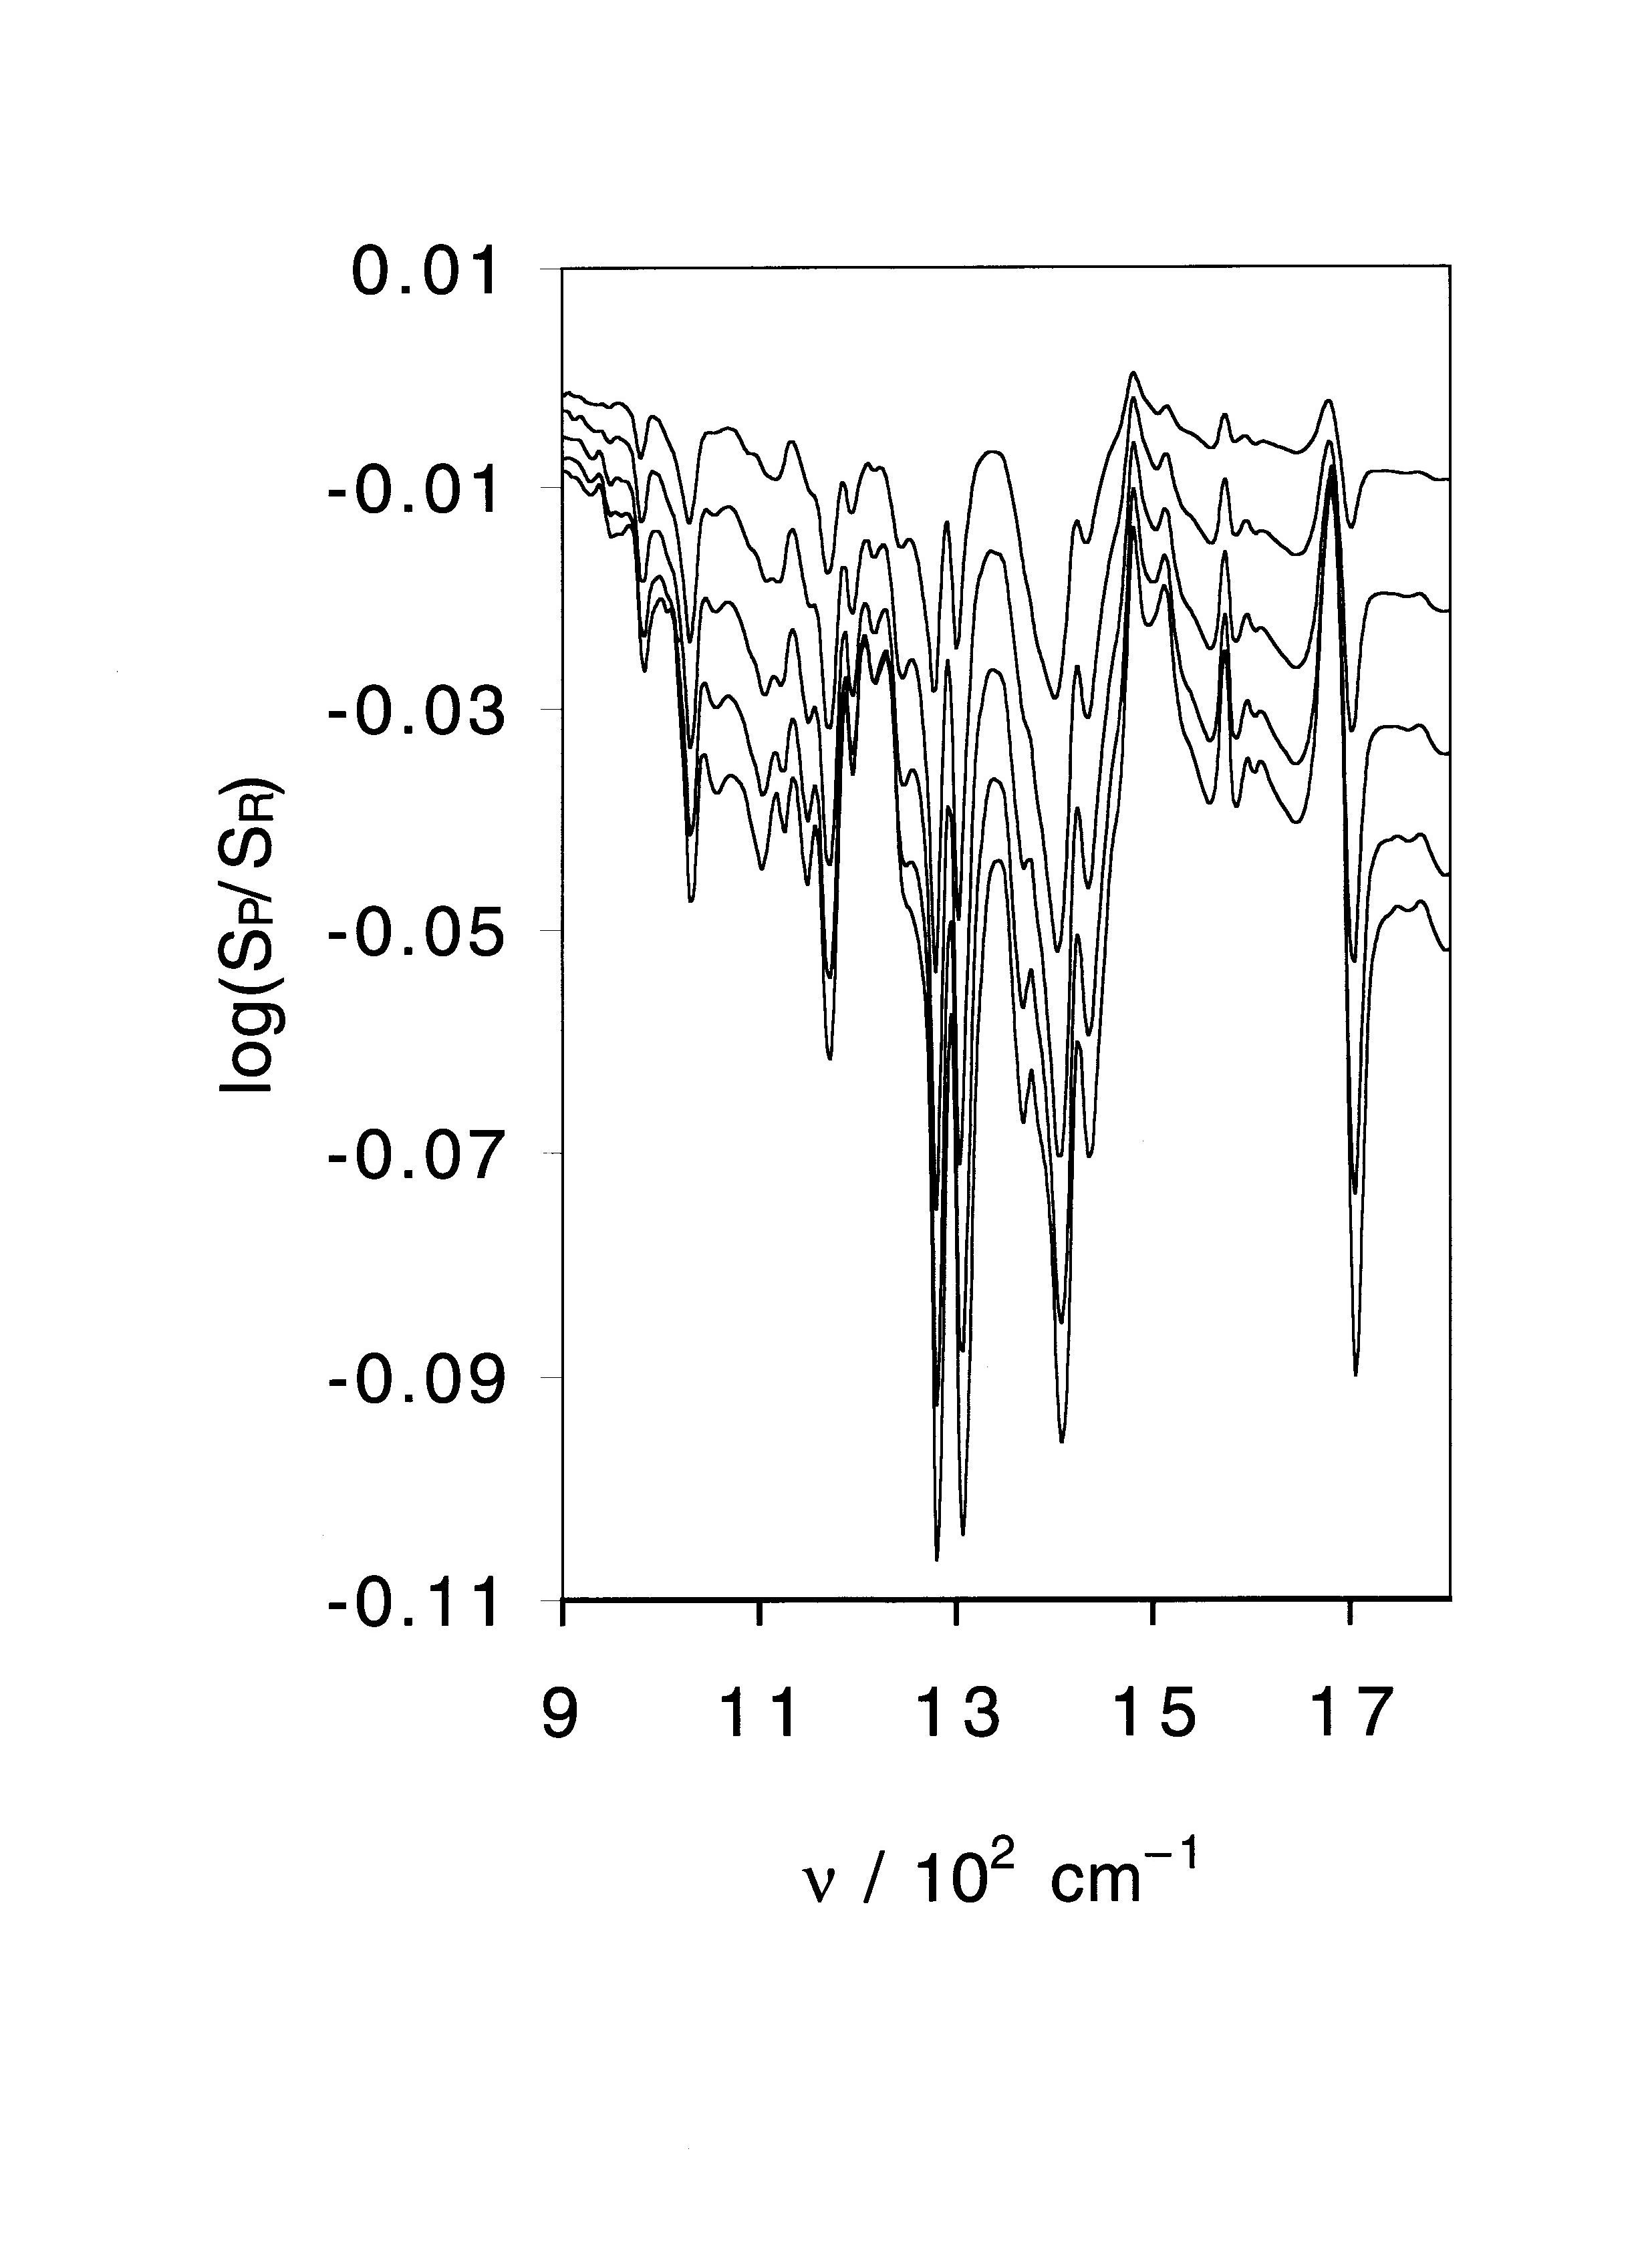


Figure S5. FTIR spectra of a PFBCT film, collected at 0.1 V intervals from +0.6 to +1.0 V inclusive, normalised to the spectrum taken at +0.5 V.


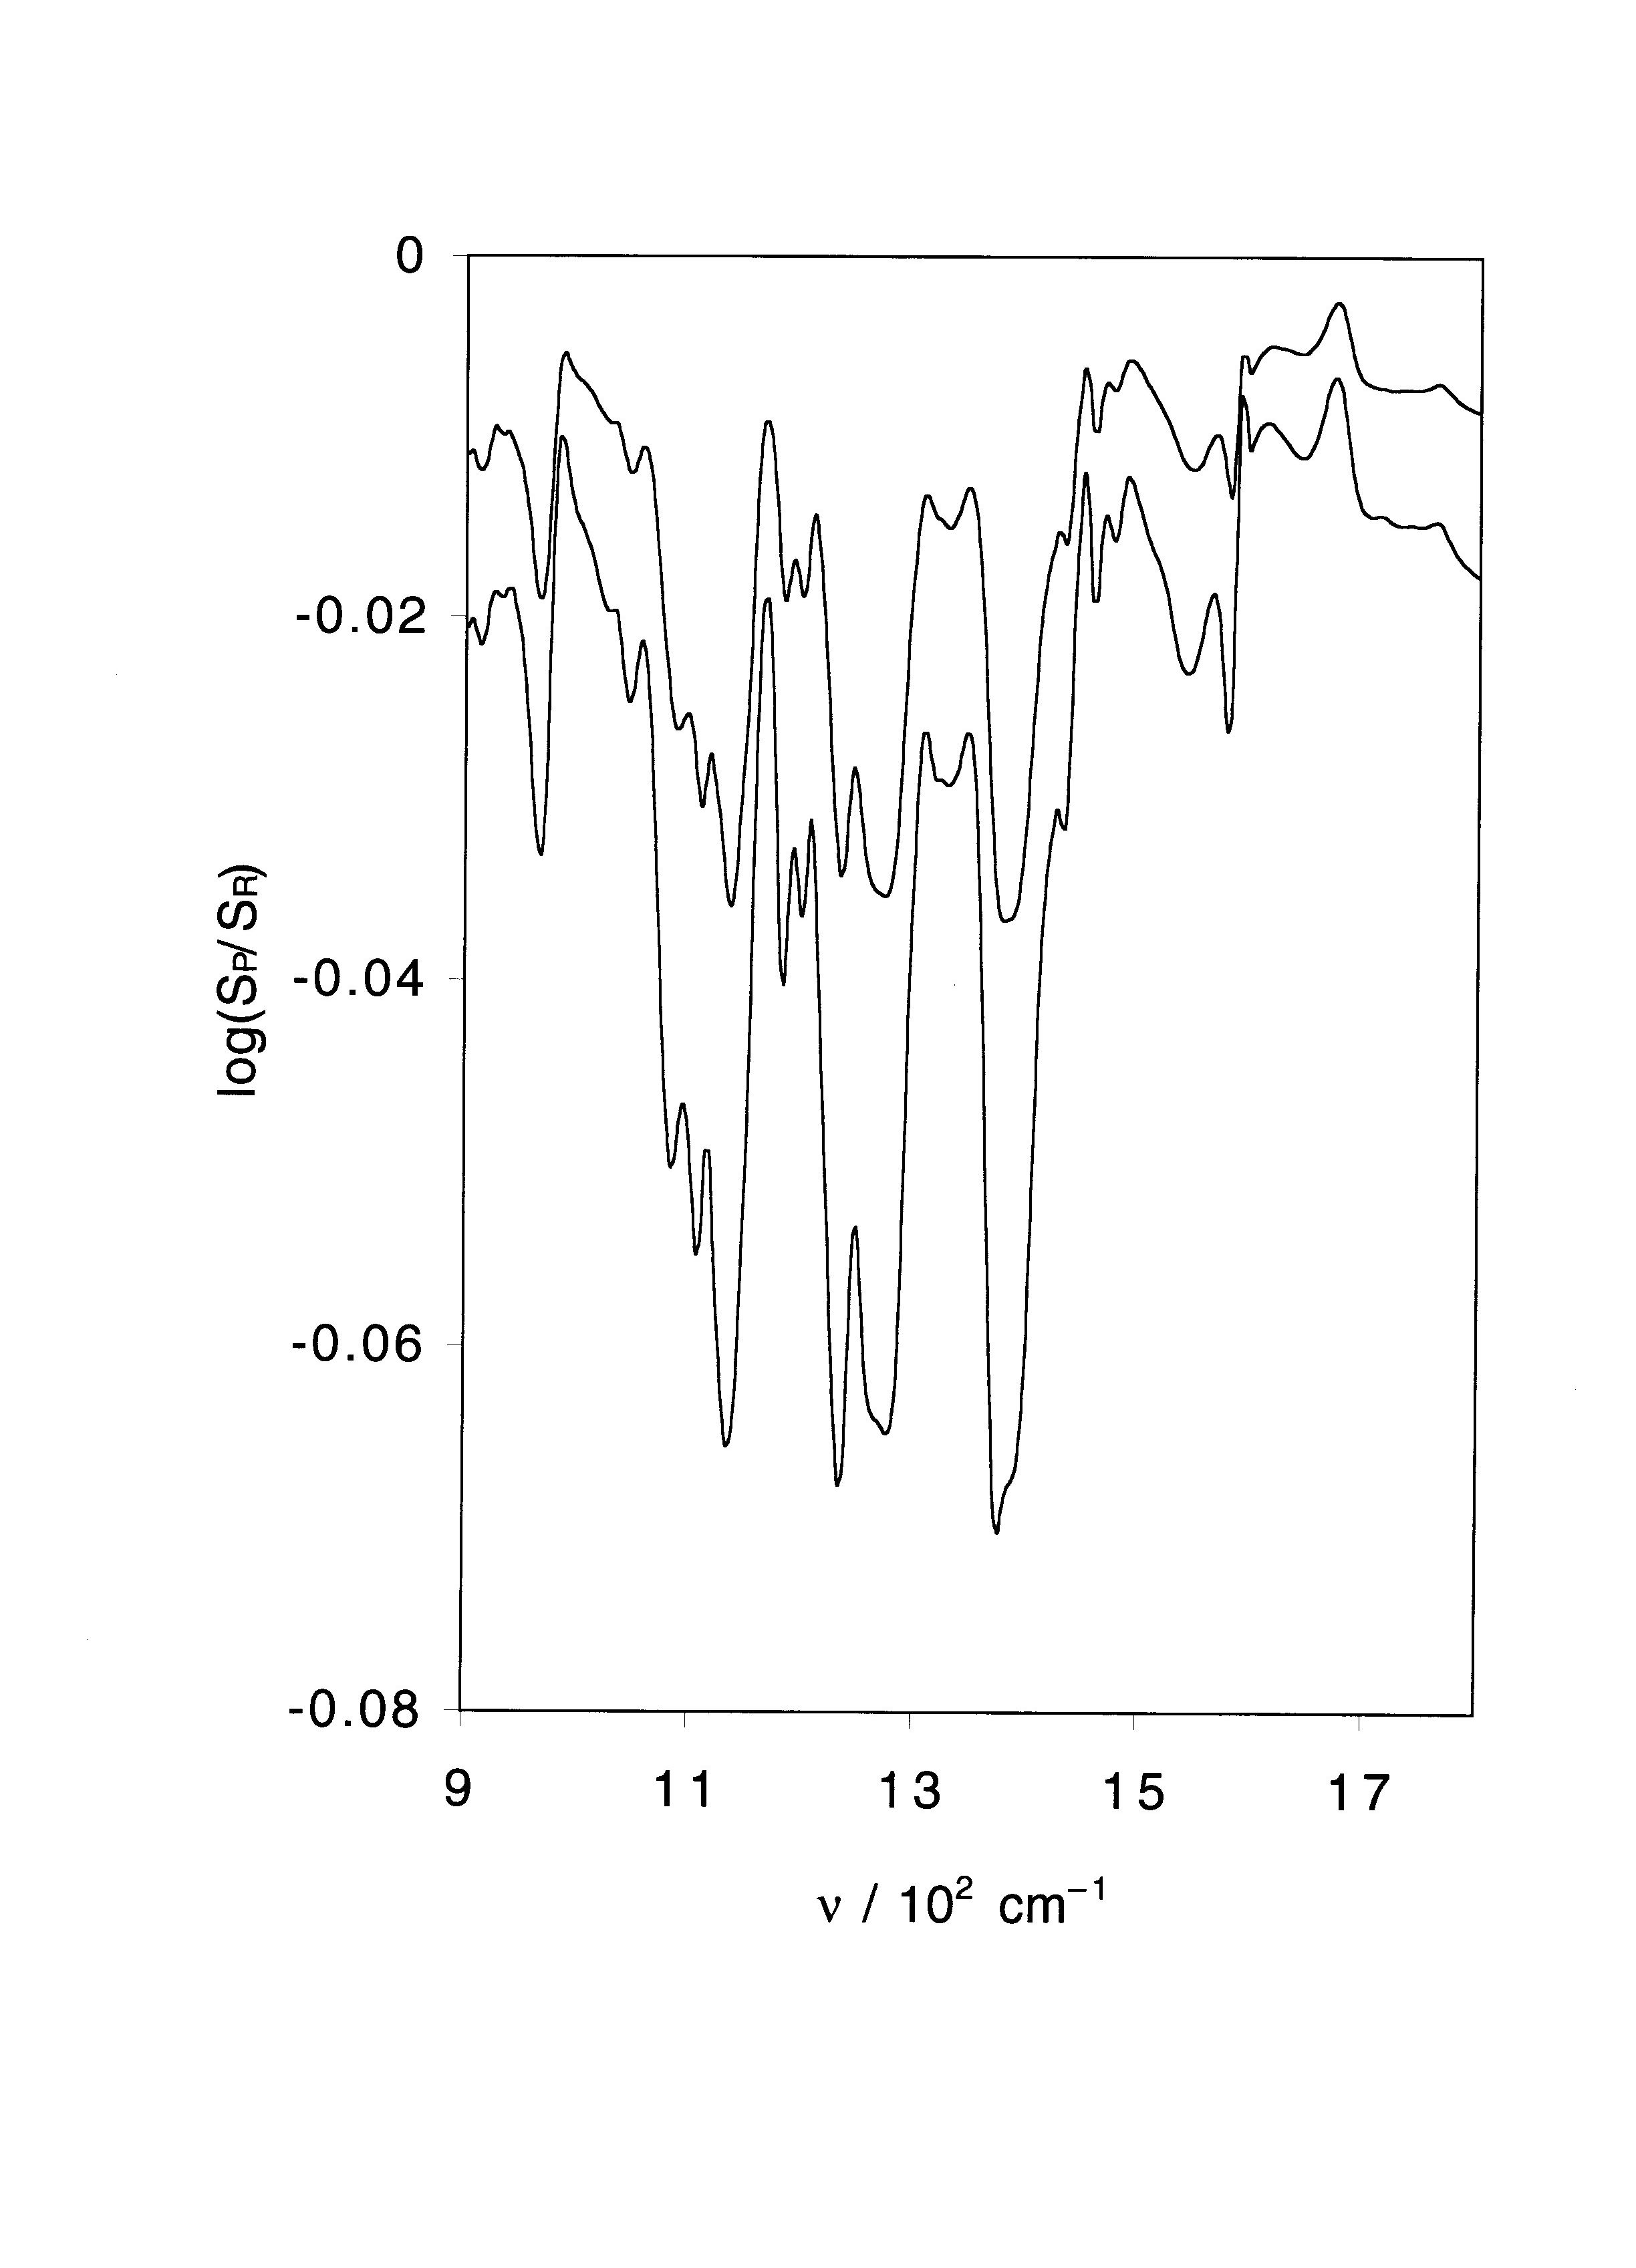


Figure S6. FTIR spectra of a PBCT film, collected at 0.1 V intervals from –1.4 V to –1.5 V, normalised to a reference spectrum taken at –1.3 V, in the region from 900 – 1800 cm–1.
